1 **Climatic influence on the magnitude of COVID-19 outbreak: a stochastic**  
2 **model-based global analysis**

3 Malay Pramanik<sup>a,e</sup>\* ([malaypramanik@ait.asia](mailto:malaypramanik@ait.asia)) \*Corresponding author;

4 Koushik Chowdhury<sup>b</sup> ([totongeo@gmail.com](mailto:totongeo@gmail.com));

5 Md Juel Rana<sup>c,d</sup> ([jranajnu@gmail.com](mailto:jranajnu@gmail.com));

6 Praffulit Bisht<sup>e</sup> ([praffulitbisht@gmail.com](mailto:praffulitbisht@gmail.com));

7 Raghunath Pal<sup>c</sup> ([Raghunath.geol7@gmail.com](mailto:Raghunath.geol7@gmail.com));

8 Sylvia Szabo<sup>a,g</sup> ([sylviaszabo@ait.asia](mailto:sylviaszabo@ait.asia));

9 Indrajit Pal<sup>f</sup> ([indrajit-pal@ait.asia](mailto:indrajit-pal@ait.asia));

10 Bhagirath Behera<sup>b</sup> ([bhagirath9@gmail.com](mailto:bhagirath9@gmail.com))

11 Qiuhua Liang<sup>h</sup> ([Q.Liang@lboro.ac.uk](mailto:Q.Liang@lboro.ac.uk))

12 Sabu S. Padmadas<sup>i</sup> ([s.padmadas@soton.ac.uk](mailto:s.padmadas@soton.ac.uk))

13 Parmeshwar Udmale<sup>a</sup> ([pd.udmale2@gmail.com](mailto:pd.udmale2@gmail.com))

14

15 <sup>a</sup> Department of Development and Sustainability, School of Environment, Resources and  
16 Development, Asian Institute of Technology (AIT), PO. Box 4, Klong Luang, Pathumthani  
17 12120, Thailand.

18 <sup>b</sup> Department of Humanities and Social Sciences, Indian Institute of Technology Kharagpur,  
19 Kharagpur 721302, West Bengal, India

20 <sup>c</sup> Centre for the Study of Regional Development, School of Social Sciences, Jawaharlal Nehru  
21 University, New Delhi, 110067, India

22

23 <sup>d</sup> International Institute for Population Sciences, Govandi Station Road, Deonar, Mumbai,  
24 400088, Maharashtra, India

25 <sup>e</sup> Centre of International Politics, Organization, and Disarmament, School of International  
26 Studies, Jawaharlal Nehru University, New Delhi, 110067, India

27 <sup>f</sup> Disaster Prevention, Mitigation, and Management, Asian Institute of Technology (AIT), PO.  
28 Box 4, Klong Luang, Pathumthani 12120, Thailand.

29 <sup>g</sup> Division of Social Statistics and Demography, Faculty of Economic, Social and Political  
30 Sciences, University of Southampton, Southampton SO17 1BJ, United Kingdom

31 <sup>h</sup> School of Architecture, Building and Civil Engineering, Loughborough University, Epinal  
32 Way, Loughborough LE11 3TU, United Kingdom

33 <sup>i</sup> Department of Social Statistics and Demography and Centre for Global Health, Population,  
34 Poverty and Policy, University of Southampton, Southampton, UK.

35

36

37

38

39

40

41

42

43

44 **Highlights:**

- 45 1. Analyzed influence of climatic & bioclimatic factors on the spread of COVID-19
- 46 2. First to analyze COVID-19 cases in 228 cities globally across three climatic zones
- 47 3. Temperature & humidity influenced COVID-19 cases in temperate & sub-tropics
- 48 4. Mean diurnal temperature & temperature seasonality had effects in tropics
- 49 5. Low temperature elicits COVID-19 cases in France, Turkey, the US, the UK, & Germany

50  
51

52 **Graphical abstract:**

53

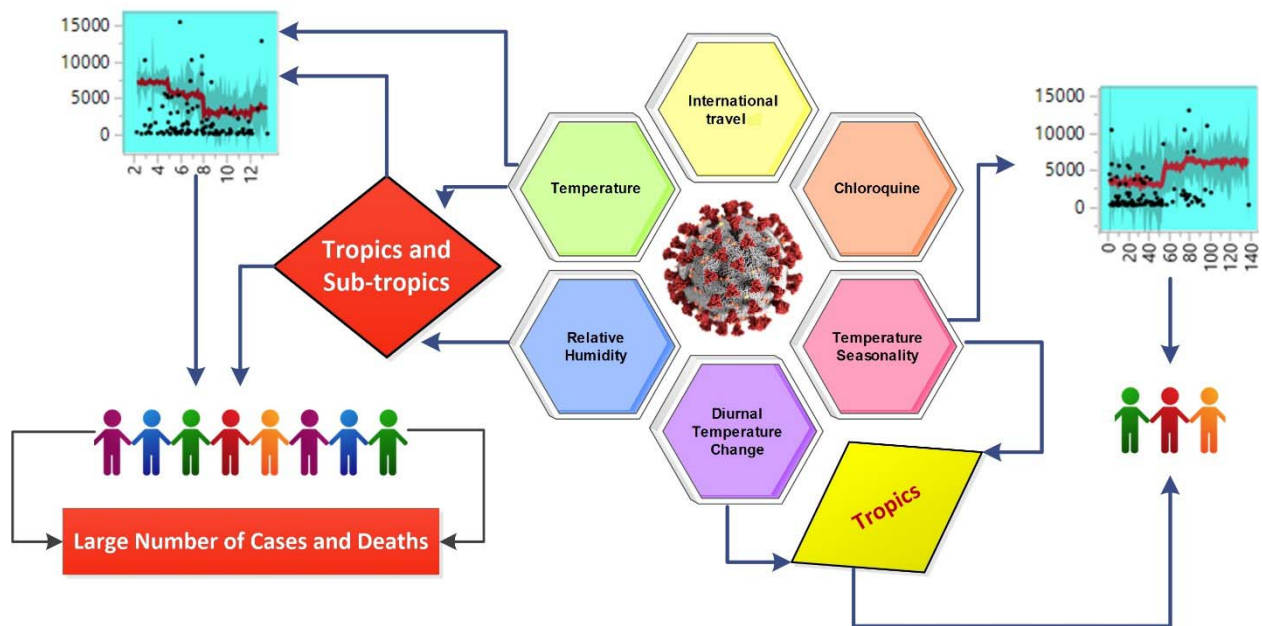

54

55

56

57

58 **Climatic influence on the magnitude of COVID-19 outbreak: a stochastic**  
59 **model-based global analysis**

60 **Abstract:**

61 This study examines the association between community transmission of COVID-19 cases and  
62 climatic predictors, considering travel information and annual parasite index across the three  
63 climatic zones, i.e., tropical, subtropical, and temperate. A Boosted Regression Tree model has  
64 been employed to understand the association between the COVID-19 cases. The results show  
65 that average temperature and average relative humidity are the major contributors in explaining  
66 the differentials of COVID-19 transmission in temperate and subtropical regions whereas the  
67 mean diurnal temperature range and temperature seasonality are the most significant  
68 determinants in tropical regions. The average temperature is the most influential factor affecting  
69 the number of COVID-19 cases in France, Turkey, the US, the UK, and Germany, and the cases  
70 decrease sharply above 10°C. Among the tropical countries, India found to be most affected by  
71 mean diurnal temperature, and Brazil faced by temperature seasonality. Most of the temperate  
72 countries like France, USA, Turkey, UK, and Germany with an average temperature between 5-  
73 12°C had high number of COVID-19 cases. The findings are expected to add to the ongoing  
74 debates on the influence of climatic factors influencing the number of COVID-19 cases and  
75 could help researchers and policymakers to make appropriate decisions for preventing the  
76 spread.

77 **Keywords:** Boosted Regression Tree; Climatic association; COVID-19; Disease transmission;  
78 Marginal effect; SARS-CoV-2; Stochastic model.

79

80

## 81 **1. Introduction**

82 The global surge of pandemic<sup>1</sup> Severe Acute Respiratory Syndrome (SARS) coronavirus disease  
83 (COVID-19) has been unprecedented in the 21<sup>st</sup> century. The virus has spread rapidly across  
84 international borders<sup>1</sup> through global travel from its primary infection epicenter in Wuhan<sup>2</sup>  
85 (China) to new epicenters in Europe (Italy, Spain, France, Germany, the UK) and North America  
86 (the US and Canada). COVID-19 is highly contagious. The risk of human to human transmission  
87 is very high and mainly through close contact and respiratory droplets<sup>2,3</sup> High fever, contagious  
88 cough, choking, severe pneumonia, and acute respiratory distress syndrome are the common  
89 symptoms.<sup>3</sup> The case fatality rate (CFR) is estimated at 3.4%, while it varies by countries and  
90 population groups.<sup>2</sup> The CFR of the current SARS-COV-2 is lower than its predecessor SARS-  
91 COV-1<sup>3</sup>, but its reproduction rate is much higher.

92 SARS-CoV-1 outbreak in 2003 infected more than 8000 individuals from 29 countries, and 774  
93 died within a period of eight months, whereas, the COVID-19 has currently infected more than  
94 four million people across 212 countries with a death toll of close to 280,000 within four  
95 months.<sup>4-6</sup> The very high infection susceptibility or high reproduction rate<sup>4</sup> of this virus makes it  
96 particularly dangerous to older people, especially when the vaccinations and the drugs for  
97 treatment are not available.<sup>7</sup>

---

<sup>1</sup> On 30 January 2020, the COVID-19 announced as an Public Health Emergency of International Concern and on 11<sup>th</sup> march, 2020 declared it as a pandemic.

<sup>2</sup> Originated from the Wuhan fish market in December, 2019.

<sup>3</sup> Severe acute respiratory syndrome coronavirus (SARS-CoV), 2002-04 epidemic. More than 8,000 people were infected from 29 countries, and 774 died worldwide

98 Historical evidence shows that meteorological conditions, e.g., temperature and relative humidity  
99 bring changes into the human activities that can influence more infections by increasing the  
100 reproduction rate of a virus.<sup>8</sup> For instance, the higher air temperature may lead to an increase in  
101 the use of centrally air-conditioning systems, which host and spread the bacillus, causing  
102 Legionnaires' Disease.<sup>9</sup> Besides, the differential climatic conditions also lead to changes in the  
103 incidences of various infectious diseases such as malaria<sup>10</sup>, dengue<sup>11</sup>, influenza<sup>12</sup>, meningococcal  
104 meningitis<sup>13</sup>, cryptosporidiosis<sup>14</sup>, Rift Valley Fever<sup>15</sup> Kyasanur Forest disease (KFD)<sup>16</sup> and Lyme  
105 disease.<sup>17,18</sup>

106 Many studies suggest that the climatic conditions, e.g., humidity and temperature play key roles  
107 in spreading infectious diseases including SARS-COV-1, 2003.<sup>19,20</sup> The daily incidence rate  
108 (DIR) of SARS-COV-1 was 18 times higher in low temperature than that higher temperature.<sup>21</sup>  
109 Moreover, high circulation of influenza viral diseases has been found in the winter season in the  
110 temperate region of the southern and northern hemispheres.<sup>22,23</sup> The relative humidity is also a  
111 leading cause of occurrences of the influenza epidemic in the US and Vietnam.<sup>24,25</sup>

112 Few recent studies argued that meteorological factors, e.g., humidity and temperature could drive  
113 the pace of ongoing COVID-19 infections<sup>26-28</sup> and local climatic conditions may drive COVID-  
114 19 growth rate.<sup>29</sup> Yet, the scientific community lacks evidence regarding the potential  
115 associations between climatic factors and COVID-19 cases at the global level. Most of the  
116 previous studies rely on the evidence from the regional levels of data and limited climatic  
117 variables. Luo et al. (2020)<sup>30</sup> examined the relationship between province-level climatic  
118 variability and increase of COVID-19 reported cases and suggested that without extensive public  
119 health interventions, increase in temperature and humidity will not lead to a decline in COVID-  
120 19 cases. More importantly, Oliveiros et al. (2020)<sup>28</sup> signify predictors percentage contribution in

121 the rate of progressions of COVID-19 cases in which temperature and humidity only contribute  
122 to 18% and remaining 82% related to other factors, such as public health, population,  
123 infrastructure. Therefore, it is essential to determine the role of climatic factors (e.g., relative  
124 humidity and average temperature) behind the spread of COVID-19, to strengthen the knowledge  
125 base of COVID-19 research.

126 As the virus spread across the globe, the number of international travellers is the primary  
127 predictor of COVID-19 outbreak<sup>31</sup> at national, regional, and local/city level. Due to high  
128 community transmission efficiency, the global cases are increasing day by day.<sup>4</sup> However, there  
129 is a significant variation in the number of COVID-19 cases in terms of growth rate and timing  
130 around. Seoul (South Korea), Tokyo (Japan), and Bangkok (Thailand) appear to have been able  
131 to "flatten the curve". At the same time, in several other countries (i.e., India and Brazil) in the  
132 tropical region, the number of COVID-19 cases are reported to be increasing significantly.  
133 Considering the above, ongoing COVID-19 pandemic situations and its increasing growth rate,  
134 more systematic research is essential, which accounts for climatic predictors, international travel,  
135 and chloroquine distribution information. In this background, the present study aims to identify  
136 the relationship between the efficiency of community transmission (spread) of the number of  
137 COVID-19 cases and climatic and bioclimatic factors as well as international travel information  
138 and public health concerns across severely affected cities distributed across tropics, sub-tropics  
139 and temperate climatic zones.

140

## 141 **2. Methods:**

### 142 **2.1 Selection of study sites**

143 The international travelers were the primary cause of the spread of the COVID-19 to the global  
144 cities. The cities are more susceptible to the spread due to more substantial human mobility,  
145 service sector engagement, and tourist visitors as compared to the rural areas. Therefore, cities  
146 are the primary focus of the present study. Also, COVID-19 cases vary significantly from one  
147 country to another, and the month of the transmission is also different globally.

148  
149 Therefore, to understand the pattern of the efficiency of region-wise community transmission, we  
150 collected the data for the countries where more than five cities were found to be significantly  
151 affected by COVID-19 cases with a higher increasing rate as of 21 April 2020. We have selected  
152 at least three cities with the most cases from each country across the world. In the case of the  
153 countries with the largest spillover, including the US, Spain, Italy, France, Germany, the UK,  
154 Turkey, Russia, Brazil, and India, the study selected ten cities for the analysis from each country.  
155 Further, out of ten cities, we have chosen five cities with the highest number of cases, whereas  
156 the remaining five cities were selected randomly to reduce the biases in the representation of a  
157 particular country. For remaining all the countries where cases are medium or less, we have  
158 taken one to three most affected cities based on the area of the countries. For smaller countries,  
159 one city, and for medium or larger countries, we have considered three cities as representatives  
160 for those countries.

161  
162 A total of 230 cities were selected for the present study. To understand regional differentiation of  
163 COVID-19 cases, the cities were divided into tropical (0-23°26'11.9" N/S), subtropical  
164 (23°26'11.9" N/S- 40° N/S), and temperate (40° N/S - 60°N/S) zones based on latitudes. In the  
165 present study, 72, 63, and 93 cities were located in tropical, subtropical, and temperate regions,



166 respectively. Two cities with polar climate were excluded from the study. The study used  
167 Boosted Regression Tree (BRT) model across climatic regions and larger spillover countries. In  
168 the following sub-section, details on variable selection and measurement, data collection  
169 procedure, and model specification are briefly described.

170

## 171 **2.2 Descriptions and measurement of predictors**

172 The present study collected and compiled the number of COVID-19 cases data at the city level  
173 from the WHO situation reports, health websites of different countries, and some data were also  
174 collected from the news bulletin, where all cases were regularly updated.

175

176 Air temperature and absolute humidity are two critical variables that may contribute to higher  
177 community transmission.<sup>32</sup> In the context of COVID-19, the survival and transmission rates of  
178 viruses are mostly higher in the regions with low humidity and cold temperature.<sup>29</sup> Hence, it was  
179 hypothesized that the higher the relative humidity and temperature, the lower the number of  
180 coronaviruses cases. Therefore, for the present analysis, the study used temperature and  
181 temperature-dependent bioclimatic variables (e.g., average diurnal temperature range, minimum  
182 temperature of the coldest month, average temperature of the coldest quarter, and temperature  
183 seasonality) and relative humidity as predictors. For each city, we extracted the average monthly  
184 temperature, and the average relative humidity data from the ECMWF ERA-5 reanalysis for  
185 January to April 2020.<sup>33</sup> The month with a maximum number of reported cases was considered to  
186 tabulate temperature and relative humidity predictors data for the respective countries. The  
187 bioclimatic data of all selected countries were extracted from the worldclim historical dataset

188 with a 1km resolution. To control for over-dispersion, we choose the maximum reported cases  
189 based on climate for the month, for example January for China and March for Italy.

190 Several studies showed that Chloroquine, a widely-used anti-malarial drug has a potentiality to  
191 reduce the vulnerability of COVID-19.<sup>34-36</sup> Chloroquine is generally used for the prevention of  
192 malaria and is beneficial for treating rheumatoid arthritis in the anti-inflammatory patient.  
193 Chloroquine anti-viral and anti-inflammatory activities may be efficient in the treatment of  
194 COVID-19 patients.<sup>34,37</sup> Malaria cases are calculated by the Annual Parasite Index (API) using  
195 both parasites, viz, Plasmodium vivax (Pv), and Plasmodium falciparum (Pf). However, in  
196 malaria-affected regions, Chloroquine is the main drug to alleviate symptoms, which can explain  
197 the reason behind fewer cases in African and South Asian countries. Hence it is assumed as one  
198 of the most important predictors to explain the number of COVID-19 cases worldwide. The API  
199 data were then extracted from the worldwide malaria cases reported in a study of Battle et al.  
200 (2015).<sup>38</sup>

201  
202 It is also established that countries with a higher number of international travelers are more likely  
203 to have high potentiality to infect other people.<sup>39</sup> As the data on international passengers are not  
204 available for 2019 and 2020, we used the 2018 data as a proxy to capture the traffic of  
205 international passengers in selected countries. The international passenger data were collected  
206 from the World Bank database.

207  
208 **2.3 Modelling approach**

209 We analyzed the cases using a BRT model across the climatic regions and the countries with a  
210 large number of cases. BRT is an additive stochastic model that integrates regression trees by

211 including an outcome to their predictors by recursive binary splits and combining multiple  
212 models to a single model, optimizing the predictive performance.<sup>40</sup> The model can describe non-  
213 linear changes, accommodate missing data, and overcome the problems of outlier data.<sup>41</sup> BRT  
214 models are found to be robust for a small number of data with missing data.<sup>42</sup> BRT model can  
215 describe multiple interaction, partial dependency (non-monotonous and non-linear) of predictors,  
216 with sufficient flexibility and very high predictive accuracy. Therefore, the model is used to  
217 capture the non-linear relationship between the number of COVID-19 cases and selected  
218 variables in the present study.

219 To run the BRT model, we first evaluated the multicollinearity using Pearson correlation  
220 coefficient ( $r$ ) and  $r \geq 0.85$  was selected as a cut-off threshold (**Figure 1; Table S1**) to remove  
221 the less important variables.<sup>43</sup> The variables were cross-validated using the Variance Inflation  
222 Factor (VIF). We found that the VIF value is more than ten and insignificant for variables  
223 temperature of the coldest month, and an average temperature of the coldest quarter (**see Table**  
224 **S2**), and hence these two variables were dropped from the analysis.<sup>44</sup> COVID-19 cases were  
225 selected as outcome variable along with a set of six independent variables or predictors (**see**  
226 **Table 1**): average temperature, diurnal temperature change, temperature seasonality, relative  
227 humidity, number of travelers, and API.

### 228 **2.3.1 Boosted regression tree modelling**

229 The motivation for boosting regression was to improving various weak learners by combining  
230 two powerful procedures: regression tree and boosting.<sup>40,45</sup> The following gradient boosting  
231 model considers the forward stage-wise manner by adding the trained model from  $F$ , an  
232 approximation function of the response variable.

$$233 \quad F_m(X) = F_{m-1}(X) + \beta_m(X) \quad (1)$$

234 where  $\beta_m(X)$  is a weak learner of the basic functions. In the BRT model,  $\beta_m$  is the small  
235 regression tree and  $F_m(X)$  is the sum of the small regression trees. For each boosting interaction,  
236  $m$  number of new regression trees are added to the BRT model ( $m=1, 2, 3, \dots, M$ ). The input  $x$   
237 denotes the predictors from **Table 1** (finally selected variable), aims to estimate response  $Y_{i,t+k}$   
238 from a training set, which entails the perfect  $\beta_m$  to satisfy  $F$

$$239 \quad F_m(X) = F_{m-1}(X_{i,t}) + \beta_m(X_{i,t}) = Y_{i,t+k} \quad (2)$$

240 which is similar to

$$241 \quad \beta_m(X_{i,t}) = Y_{i,t+k} - F_{m-1}(X_{i,t}) \quad (3)$$

242  $\beta_m$  in equation (3) is the current residuals  $r_{m,i,t} = Y_{i,t+k} - F_{m-1}(X_{i,t})$  interaction with  $m$  to notice  
243 that current residuals have a negative slope of square error of loss functions,

$$244 \quad \frac{\partial^1(Y_{i,t+k} - F_{m-1}(X_{i,t}))^2}{\partial F_{m-1}(X_{i,t})} = Y_{i,t+k} - F_{m-1}(X_{i,t}) \quad (4)$$

245 It indicates that  $\beta_m$  equalize the negative gradient of the squared loss function. Moreover,  
246 equation (4) proves that loss function is minimized in the gradient boosting algorithm. It also  
247 generalizes other loss functions by substituting the square error with different loss functions and  
248 their gradients. For more details of BRT, see Hastie et al. (2011), Scikit-learn (2015), Persson et  
249 al. (2017)<sup>45-47</sup>.

250 To avoid overfitting, a simple regularization strategy is to scale the contribution of each  
251 regression tree by a factor  $v$ .

$$252 \quad F_m(X) = F_{m-1}(X) + v\beta_m(X) \quad (5)$$

253 The parameter  $v$  is the learning rate as it magnifies the length of the gradient descent procedure.  $v$   
254 strongly interacts with the number of boosting iterations  $M$ . In order to converge training error,  
255 smaller values of  $v$  require more iterations and more basic functions. Several studies suggest that

256 low values of  $v$  favor better test error. For a more detailed discussion of the interaction between  $v$   
257 and  $M$ , see Ridgeway (2007).<sup>48</sup>

258

### 259 **2.3.2 Model Calibration**

260 In this model, a 25% sample were used for training, and 75% sample distributed for testing. This  
261 method has been simulated 1,000 times to generate statistical inference by using ten times the  
262 loss function by cross-validation. In each BRT model, the subsampling procedure requires a  
263 parameter called the ‘bag fraction’ which was set at 0.75<sup>49</sup>, and at least 1,000 nodes/trees were  
264 used.<sup>40</sup> In addition, a sensitivity analysis was conducted by setting a bag fraction of 0.5. All  
265 results presented in the following sections were calculated by averaging the predicted values of  
266 50 bootstrap replicates. All analyses were conducted using DISMO package version Rv3.4.0.  
267 Moreover, the marginal association was assessed for all independent variables across climatic  
268 regions and the countries with major COVID-19 cases spillover. The relative contribution of  
269 response variables were also assessed, where a larger value indicated higher importance.<sup>50</sup>

### 270 **2.3.3 Model Validation**

271 The model results were checked using the area in the Receiver Operating Characteristic (ROC)  
272 curve. Area under the ROC Curve (AUC) values differ between 0 and 1. The value of 0.5  
273 suggests that the model results were less than random, and the value of 1.0 implies absolute  
274 discrimination.<sup>43,51</sup>

## 275 **3. Results:**

### 276 **3.1 Model validation and bag fraction analysis**

277 The area under the curve in ROC (**Figure 2**) for the tested data was 0.9462, which confirms a  
278 high level of accuracy and forecasting ability of the model.<sup>43</sup> A comparison between two bag  
279 fractions (0.5 and 0.75) was carried out in BRT models (Table S3). In general, only small  
280 variations within 2% were observed in relative contributions (RCs) of variables. The highest  
281 difference between RCs in temperature was about 1.87% in Russia (**Table S3**).

### 282 **3.2 Descriptive statistics:**

283 As of 10 May 2020, a total of 4.18 million people were affected, and 0.283 million deaths were  
284 reported in the world.<sup>52</sup> The virus has affected 210 territories and countries, wherein most of the  
285 cases were reported in developed countries. The climatic conditions may be relevant to the  
286 variation in the number of COVID-19 cases. To better understand the role of climatic predictors,  
287 **Table 2** shows the median, 10<sup>th</sup> percentile and 90<sup>th</sup> percentile of the average temperature,  
288 average relative humidity, diurnal temperature change, temperature seasonality in selected  
289 countries and regions across the globe. In the temperate zone, median average temperature,  
290 average relative humidity, diurnal temperature change, and temperature seasonality found to be  
291 9°C, 67%, 7°C, and 70%, respectively, whereas 25°C, 65%, 7°C, and 27%, respectively, in the  
292 tropical zone (**Table 2**). It indicates that there is a significant variation in temperature and  
293 temperature seasonality within these climatic regions. The number of COVID-19 cases are  
294 negatively associated with average temperature, diurnal temperature change, and relative  
295 humidity, and positively associated with temperature seasonality for all climatic region (**Figure 3**  
296 **and 4**). Also, the number of COVID-19 cases was positively associated with the number of  
297 international travelers and API (**Table 3**).

### 298 **3.3. Relative effects of predictors**

299 **Table 3** presents the association between COVID-19 and climatic parameters, number of  
300 international passengers and API based on aggregate global model. We excluded the information  
301 about the number of international travelers for country-level analysis due to single data for the  
302 country level. Although it is a primary source of infection, it has no role in community  
303 transmission within a country. For the variable of API, we considered only those regions which  
304 have malaria endemicity.

305 **Table 3** represents the region and country wise association between climatic parameters and the  
306 number of COVID-19 cases. The results show that average temperature (47.70%) and average  
307 relative humidity (30.50%) were the major contributors in explaining the differentials of  
308 COVID-19 transmission in the temperate zone. At the same time, the mean diurnal range  
309 (54.70%) and temperature seasonality (33.30%) were the most significant determinants of this  
310 viral community transmission in the tropical zone. In the temperate zone, the role of average  
311 temperature (66.5%) and relative humidity (22.3%) were the highest among the selected all  
312 predictors.

313  
314 The results show that in temperate countries, the average temperature was a major contributor to  
315 the number of cases in France (90.70%), Turkey (82.80%), the US (75.10%), the UK (39.40%),  
316 Germany (34.30%). Similarly, the average relative humidity contributed more in Spain (71.0%),  
317 the UK (56.60%), and Italy (32.20%), and favorable relative humidity for the spread was found  
318 in the range of 60 to 70 % in countries from the temperate zone. The Russian cases were mostly  
319 affected by the temperature seasonality contributing 92.30% to the spread. The mean diurnal  
320 temperature range was contributing about 60.20% of the cases in Germany (**Table 3**).

321

322 The cities located in the tropical zone, like cities from India and Brazil, were mostly influenced  
323 by the diurnal temperature range. In India, 80.70% of the cases were explained by the mean  
324 diurnal temperature, followed by the average temperature (13%) and temperature seasonality  
325 (1.40%). The maximum number of cases in India was explained in the range of temperature  
326 seasonality 22% to 38%. The community transmission in Brazil was mostly influenced by  
327 temperature seasonality (41.40%), followed by the mean diurnal range of temperature (23.10%),  
328 API (12.20%) average temperature (11.60%), and relative humidity (10.30%) (Table 3).

329

### 330 **3.4 COVID-19 response to the predictors in different climatic regions**

331 The association between climatic indicators and COVID-19 risks is illustrated in Figure 5. A  
332 non-linear relationship is observed between average temperature and COVID-19 cases in the  
333 temperate and sub-tropical zones. The results show that average temperature was negatively  
334 associated with COVID-19 transmission risks, which tend to reduce significantly when the  
335 average temperature varied from 5°C to 12°C in the sub-tropical zone and 5°C to 11°C in the  
336 temperate zone. With increasing average temperature, community transmission is reduced  
337 significantly. The response of the number of COVID-19 cases was slightly positive and  
338 associated with relative humidity, although it was a less influencing factor in the temperate and  
339 sub-tropical zones. After the threshold of about 60% relative humidity in these two regions, the  
340 probability of disease transmission increased (Figure 5).

341

342 On the contrary, these two meteorological parameters did not have a significant association with  
343 the disease transmission in the tropical region. The significant community transmission occurred  
344 with the changes in mean diurnal temperature, which was ranged from 4 to 8°C. After this, there



345 was a significant decline in the number of COVID-19 cases in community transmission, which  
346 had little variations with average temperature. The temperature seasonality was also a significant  
347 variable showing positive association for the community transmission in the tropical countries.  
348 Besides these factors, API had a very poor association with the COVID-19 transmission in the  
349 tropical regions.

### 350 **3.5 COVID-19 response to the predictors in different countries:**

351 **Figure 6** represents the country-wise association between the climatic predictors and the  
352 COVID-19 cases. The results show that in France, Turkey, the US, the UK, Germany, the  
353 number of COVID-19 cases were non-linearly but highly associated with average temperature.  
354 Maximum cases were found during the temperature range of 5 to 10°C, and after the temperature  
355 increased beyond 10°C infected cases declined. Similarly, the average relative humidity was a  
356 contributing factor in Spain, the UK, and Italy, and favorable relative humidity for the disease  
357 transmission was found to be 60 to 70% in temperate countries. Most interestingly in the case of  
358 Turkey, it was found that the cases were increasing after crossing the 73% threshold of relative  
359 humidity. The temperature seasonality mostly influenced the Russian cases. About 92% of the  
360 cases in Russia were influenced by temperature seasonality, followed by Italy (64.3%), and the  
361 US (21.5%). It concludes that more than 70% variation of temperature (temperature seasonality)  
362 may cause a significant increase in COVID-19 community transmission. But with the 80% of  
363 temperature seasonality, there was a declining trend for the US cases, whereas Russian cases  
364 declined after the value reached 110%. This might be because the location and extension of  
365 Russia is northwards than the US where extreme seasonality was found. Another important  
366 variable, mean diurnal range of temperature contributes more (about 60%) to the community  
367 transmission in Germany (**Figure 6**).

368 It was found that the COVID-19 community transmission in the tropical zone was not strongly  
369 associated with the temperature. Maximum cases are explained by 30-40% of seasonal variation  
370 in temperature, and after 40% seasonal variation in temperature, the number of cases may decline  
371 sharply. The cases in India were mostly associated with the diurnal range of temperature  
372 (80.7%). The cases in Brazil were mostly influenced by the temperature seasonality (41.4%). In  
373 Brazil, the maximum number of cases were found in the range 5° to 8°C of the mean diurnal  
374 temperature. The API values were influenced slight positively, although the rate was very low. In  
375 Brazil, the cases were sharply increasing with an increase of average temperature. The results  
376 also showed that the average temperature ranging from 25 to 30 °C was the most influential  
377 factor behind the number of cases in these tropical countries ([Figure 7](#)).

#### 378 **4. Discussion:**

379 Many studies have tried to establish the relationship between meteorological parameters and  
380 transmission of influenza epidemic.<sup>12</sup> In recent times, several efforts have also been made to  
381 evaluate the association between climatic predictors and COVID-19 transmission.<sup>26-29, 53</sup> Existing  
382 studies mainly focused on regional perspectives of COVID-19 transmission and its association  
383 with climatic conditions. However, studies at the macro level are limited, in particular, the  
384 studies which accounts for different climatic regions. Besides, the influence of climatic  
385 predictors, including travel information and API on the number of COVID-19 cases and  
386 community transmission, has limitedly established. An empirical analysis of the influence of  
387 climatic, bioclimatic, and factors like international travel information and API on COVID-19  
388 community transmission using city-level data across three climatic regions in countries with the  
389 most number of COVID-19 cases is expected to improve the understanding of the spread of the  
390 disease.

391 The results of country-level analysis showed that in Indonesia, the only average temperature is  
392 linked with the COVID-19 transmission, while humidity, maximum or minimum temperatures  
393 are not correlated.<sup>53</sup> In this background, the present study used climatic, bioclimatic and  
394 international travel information and API data for 72 cities from the tropical, 72 cities from the  
395 sub-tropical and 93 cities from the temperate zones. The study found that increasing temperature  
396 and decreasing average relative humidity were associated with the slowdown the community  
397 transmission of COVID-19. At the same time, Wang et al. (2020a)<sup>26</sup> revealed that higher average  
398 temperature and higher relative humidity considerably decrease the COVID-19 transmission.  
399 About 1°C rise in average temperature is related to a reduction of reproduction rate of  
400 transmission by 0.0225 in China<sup>26</sup> and a 1% rise in relative humidity lowers the reproduction rate  
401 by 0.0158. Another study by Bu et al. (2000) concludes that in China, average temperature  
402 ranges between 13°C and 19°C and average relative humidity ranges between 50% - 80%  
403 constitute an appropriate condition for the community transmission of this virus.<sup>54</sup>

404 A study from China showed that the cases of COVID-19 were highest within the 10°C while it is  
405 considerably low more than 10°C temperature.<sup>27</sup> The present study found a linear relationship  
406 between the transmission of COVID-19 and temperature in the temperate region, while there was  
407 no significant association between these two in the tropical region. As China is from a temperate  
408 region, with an increase in temperature, the number of COVID-19 cases also increased in the  
409 country. It might therefore appear that COVID-19 needs a 4°C of minimum level of temperature  
410 for smooth transmission. Also, in the temperate and subtropical regions, COVID-19 transmission  
411 was lower when the temperature remains below 10°C. Possibly, in these regions, the unfavorable  
412 temperature keeps people inside their homes, and “social distancing” was maintained. Therefore,  
413 the temperature might have played a significant role in the dispersion of the virus in the

414 temperate and subtropical regions.<sup>55</sup> While the average temperature was not associated with  
415 COVID-19 transmission in the tropical region, the temperature seasonality and mean diurnal  
416 temperature become important for the transmission in the region. Since various parameters of  
417 temperature were associated differently with the outbreak in different climatic regions such as  
418 the temperate and tropical zones, it may also vary over regional/country levels due to changes in  
419 geographical and ecological settings. Thus, the regional level analysis of heterogeneous climatic  
420 associations with the transmission is equally necessary along the global assessments.

421 The present study found that the role of average relative humidity on COVID-19 transmission  
422 was weaker and inconsistent compared to the temperature. COVID-19 community transmission  
423 in temperate zone were generally suitable for growth in the number of cases in the conditions of  
424 high relative humidity but not exceedingly wet environments (>90%). Moreover, in the tropical  
425 zone, high relative humidity is also linked with the transmission rate of COVID-19 cases but not  
426 strongly associated, as in the temperate zone. The results of the present study are consistent with  
427 the previous studies, showing the inconsistent effects of relative humidity on COVID-19 cases in  
428 the regional case of China.<sup>27</sup> The study also found a similar relationship for Hemorrhagic fever  
429 with renal syndrome (HFRS) in China, which was positively associated with cold days in  
430 China.<sup>56</sup> The relationship between relative humidity and COVID-19 cases can be complicated in  
431 a country-level analysis as wet condition may block the viral replication.<sup>12,55</sup> Deyle et al., (2016),  
432 signified that the effects of relative humidity on influenza disease depends on the temperature.<sup>57</sup>  
433 This could explicate our findings that the impact of humidity on COVID-19 transmission could  
434 be stronger in the temperate zone and weaker in the tropical zone as a procession of seasonal  
435 temperature change.

436 More detailed country-specific findings revealed similar results to those of the regional level,  
437 albeit with slight variations. In most of the temperate countries such as France, the USA, Turkey,  
438 the UK, and Germany, the cities having an average temperature in the range 5-10°C have a  
439 higher level of COVID-19 transmission rate than their counterparts (Figure 5). Besides, other  
440 climatic parameters like average relative humidity played an important role in some of the  
441 countries such as Italy, Spain, the UK, and Russia. In humid region with a favourable humidity  
442 60-70%, if infected people sneezes and coughs, the released tiny droplets into the surrounding  
443 environment, and it travels further into the air. The droplets in the air may not evaporate soon,  
444 and more likely to infect a new people.<sup>58</sup> In summary, temperature and humidity can be used for  
445 predicting the COVID-19 transmission in these countries.

446 Besides the climatic factors, our results showed that chloroquine distribution affects the COVID-  
447 19 transmission, particularly in tropical countries such as Brazil and India. A non-randomized  
448 clinical trial shows that anti-malarial drugs such as Hydroxychloroquine and azithromycin  
449 weaken the symptoms of COVID-19.<sup>35</sup> The API values slightly positively influenced the number  
450 of COVID-19 cases in these countries, and the rate of influence was very low because cities are  
451 less prone to malaria globally.<sup>38</sup> Hence, in the areas where the prevalence of malaria was  
452 relatively high, the percentage of infected people might be less in the form of asymptomatic or  
453 mild symptomatic as compared to the areas where the prevalence of malaria is low (e.g., South  
454 Asian and African countries). The development of immunity against malaria perhaps lessens the  
455 probability of showing symptoms among the people in malaria-affected regions.<sup>35</sup>

456 Other strains of coronavirus such as HCoV-HKU1, HCoV-229E, HCoV-OC43, and HCoV-  
457 NL63 generally show symptoms like the common cold. The COVID-19 seemed to have a strong  
458 seasonality effect from December to April, although data for other months are not available for

459 the comparison. The transmission of the virus lessens during the summer season.<sup>59</sup> In the coming  
460 months, in general, the temperature will be increasing in the countries from the northern  
461 hemisphere. At the same time, the temperature will be decreasing in the countries of the southern  
462 hemisphere. Hence, the findings from this study would have important implications in  
463 formulating strategies to deal with COVID-19-related in the near future. It should be noted that  
464 the present study does not predict the climatic parameter-based months with higher risk for the  
465 cities of different climatic zones. Future studies may emphasize on predicting the monthly  
466 climatic conditions and associated transmission risk of COVID-19 across the countries and  
467 regions. The present study does not include other factors, such as the human physiological  
468 response of a community to the virus and social and economic determinants of viral transmission  
469 due to data limitations.

470

## 471 **5. Conclusions:**

472 The present study used city level climatic, bioclimatic, travel, and chloroquine distribution data  
473 to identify the relationship between the climatic region-wide and country-wide variations and the  
474 number of COVID-19 cases by the marginal effects of predictors. The study concludes that  
475 climatic and bioclimatic predictors across three climatic zones significantly affects the spread of  
476 the number of COVID-19 cases. The findings of the present study are expected to improve the  
477 understanding of the relationships between the climatic variables and the number of COVID-19  
478 cases. It underlines the importance of meteorology-based early warning systems to facilitate  
479 timely response to COVID-19 community transmission. The finding from the present study are  
480 expected to add to the ongoing debates on the influence of climatic factors on the spread of

481 COVID-19 cases and could help researchers and policymakers to make appropriate decisions for  
482 preventing the spread.

483

484

485

486 *Conflict of Interest:*

487 We have no conflict of interest of any matter regarding manuscript, figures and tables that  
488 submitted in your journal, all of submitted file is prepared by the authors.

489

490

491

492

493

494

495

496

497

498

499

500  
501  
502  
503  
504  
505  
506  
507  
508  
509  
510  
511  
512  
513  
514  
515  
516  
517  
518  
519  
520

References:

[1] Cai Y, Huang T, Liu X, and Xu G. The Effects of "Fangcang, Huoshenshan, and Leishenshan" Makeshift Hospitals and Temperature on the Mortality of COVID-19. *medRxiv*. 2020.

[2] World Health Organization, (WHO). Coronavirus disease 2019 (COVID-19). Situation Report 92 2020a.

[3] Centers for Disease Control and Prevention. 2020a. Symptoms of Novel Coronavirus (2019-nCoV). 10 February 2020a; Retrieved 10 February 2020.

[4] Ying L, Gayle AA, Smith A, and Rocklov J. The reproductive number of COVID-19 is higher compared to SARS coronavirus. *Journal of Travel Medicine*. 2020; 27 (2). doi: [org/10.1093/jtm/taaa021](https://doi.org/10.1093/jtm/taaa021)

[5] Sandoiu A. Why does SARS-CoV-2 spread so easily? 2020; <https://www.medicalnewstoday.com/articles/why-does-sars-cov-2-spread-so-easily#Spike-protein-on-the-new-coronavirus> (Accessed on 21th April 2020).

[6] Dong E, Du H, and Gardner L. An interactive web-based dashboard to track COVID-19 in real time. *The Lancet infectious diseases*. 2020.



- 521 [7] Newton PN Bond KC. COVID-19 and risks to the supply and quality of tests, drugs, and  
522 vaccines. *Lancet* 2020. doi: [10.1016/ S2214-109X \(20\)30136-4](https://doi.org/10.1016/S2214-109X(20)30136-4)
- 523 [8] Hammer GL, Nicholls N, and Mitchell C. (Eds.). Applications of seasonal climate  
524 forecasting in agricultural and natural ecosystems. *Springer Science & Business Media*.  
525 2000; 21.
- 526 [9] Simmering JE, Polgreen LA, Hornick DB, Sewell DK, and Polgreen PM. Weather-dependent  
527 risk for Legionnaires' disease, United States. *Emerging infectious diseases*. 2017; 23(11):  
528 1843-1851.
- 529 [10] Simmering JE, Polgreen LA, Hornick DB, Sewell DK, and Polgreen PM. Weather-  
530 dependent risk for Legionnaires' disease, United States. *Emerging infectious diseases* 2017;  
531 23(11): 1843-1851.
- 532 [11] Kim JE, Choi Y, Lee CH. Effects of climate change on Plasmodium vivax malaria  
533 transmission dynamics: A mathematical modeling approach. *Applied Mathematics and*  
534 *Computation* 2019; 347:616–630. doi [10.1016/j.amc.2018.11.001](https://doi.org/10.1016/j.amc.2018.11.001).
- 535 [12] Liu K, Hou X, Ren Z, Lowe R, Wang Y, Li R, Liu X, Sun J, Lu L, Song X, and Wu H.  
536 Climate factors and the East Asian summer monsoon may drive large outbreaks of dengue in  
537 China. *Environmental Research* 2020; 183: 109190.
- 538 [13] Chong KC, Lee TC, Bialasiewicz S, Chen, J.; Smith, D. W.; Choy, W. S.; & Lee, H. K.  
539 Association between meteorological variations and activities of influenza A and B across  
540 different climate zones: a multi-region modelling analysis across the globe. *Journal of*  
541 *Infection*. 2020; 80(1): 84-98.
- 542 [14] Salomon A, Berry I, Tuite AR, Drews S, Hatchette T, Jamieson F, Johnson C, Kwong J,  
543 Lina B, Lojo J, Mosnier A, Ng V, Vanhems P, Fisman DN. Influenza increases invasive

- 544 meningococcal disease risk in temperate countries, *Clinical Microbiology and Infection*.  
545 2020. doi: [10.1016/j.cmi.2020.01.004](https://doi.org/10.1016/j.cmi.2020.01.004).
- 546 [15] Hu WB, Tong SL, Mengersen K, Connell D. Weather variability and the incidence of  
547 cryptosporidiosis: Comparison of time series Poisson regression and SARIMA models,  
548 *Annals Epidemiology*. 2007; 17: 679–688.
- 549 [16] Mweya CN, Mboera L, and Kimera SI. Climate Influence on Emerging Risk Areas for Rift  
550 Valley Fever Epidemics in Tanzania. *The American journal of tropical medicine and*  
551 *hygiene* 2017; 97(1): 109–114. doi: [10.4269/ajtmh.16-0444](https://doi.org/10.4269/ajtmh.16-0444)
- 552 [17] Pramanik M, Singh P, Dhiman R. Identification of Bio-climatic Determinants and Potential  
553 Risk Areas for Kyasanur Forest Disease in Southern India using MaxEnt Modelling  
554 Approach. 2020; doi: [10.21203/rs.2.22417/v1](https://doi.org/10.21203/rs.2.22417/v1).
- 555 [18] Brownstein JS, Helford TR, and Fish D. Effect of Climate Change on Lyme Disease Risk in  
556 North America. *Eco Health* 2005; 2(1), 38–46. doi: [10.1007/s10393-004-0139-x](https://doi.org/10.1007/s10393-004-0139-x)
- 557 [19] Monaghan AJ, Moore SM, Sampson KM, Beard CB, and Eisen RJ. Climate change  
558 influences on the annual onset of Lyme disease in the United States. *Ticks Tick Borne Dis*.  
559 2015; 6: 615–622.
- 560 [20] Chan KH, Peiris JS, Lam SY, Poon LL, Yuen KY, and Seto WH. The Effects of  
561 Temperature and Relative Humidity on the Viability of the SARS Coronavirus. *Adv Virol*.  
562 2011; 734690.
- 563 [21] Yuan J, Yun H, Lan W, Wang W, Sullivan SG, Jia S, and Bittles AHA. climatologic  
564 investigation of the SARS-CoV outbreak in Beijing, China. *American Journal of Infection*  
565 *Control* 2006; 34(4): 234-236.

- 566 [22] Tan J, Mu L, Huang J, Yu S, Chen B, and Yin J. An initial investigation of the association  
567 between the SARS outbreak and weather: with the view of the environmental temperature  
568 and its variation. *Journal of Epidemiology & Community Health* 2005; 59(3): 186-192.
- 569 [23] Lemaitre J, Pasetto D, Perez-Saez J, Sciarra C, Wamala JF, and Rinaldo A. Rainfall as a  
570 driver of epidemic cholera: comparative model assessments of the effect of intra-seasonal  
571 precipitation events. *Acta tropica* 2019; 190: 235-243.
- 572 [24] Tamerius JD, Shaman J, Alonso WJ, Bloom-Feshbach K, Uejio CK, Comrie A.  
573 Environmental predictors of seasonal influenza epidemics across temperate and tropical  
574 climates. *PLoS Pathog.* 2013; 9(3): e1003194.
- 575 [25] Dalziel BD, Kissler S, Gog JR, Viboud C Bjørnstad ON, Metcalf CJE, and Grenfell BT.  
576 Urbanization and humidity shape the intensity of influenza epidemics in US cities. *Science*  
577 2018; 362(6410): 75-79.
- 578 [26] Thai PQ, Choisy M, Duong TN, Thiem VD, Yen NT, Hien NT, and Horby P. Seasonality of  
579 absolute humidity explains seasonality of influenza-like illness in Vietnam. *Epidemics.*  
580 2015; 13, 65-73.
- 581 [27] Wang J, Tang K, Feng K, and Lv W. High Temperature and High Humidity Reduce the  
582 Transmission of COVID-19. 2020a; SSRN 3551767.
- 583 [28] Shi P, Dong Y, Yan H, Li X, Zhao C, Liu W, He M, Tang S, and Xi S. The impact of  
584 temperature and absolute humidity on the coronavirus disease 2019 (COVID-19) outbreak-  
585 evidence from China. *medRxiv.* 2020.
- 586 [29] Oliveiros B, Caramelo L, Ferreira NC, Caramelo F. Role of temperature and humidity in the  
587 modulation of the doubling time of COVID-19 cases. *medRxiv.* 2020.

- 588 [30] Ficetola GF, Rubolini D. Climate affects global patterns of COVID-19 early outbreak  
589 dynamics. *medRxiv*. 2020.
- 590 [31] Luo W, Mujumdar M, Liu D, Poirier C, Mandl K, Lipsitch M, & Santillana M. The role of  
591 absolute humidity on transmission rates of the COVID-19 outbreak. *medRxiv*. 2020.  
592 [10.1101/2020.02.12.20022467](https://doi.org/10.1101/2020.02.12.20022467)
- 593 [32] Phelan AL, Katz R, and Gostin LO. The novel coronavirus originating in Wuhan, China:  
594 challenges for global health governance. 2020; doi:[10.1001/jama.2020.1097](https://doi.org/10.1001/jama.2020.1097)
- 595 [33] Sajadi M, Habibzadeh P, and Vintzileos A. Temperature, Humidity and Latitude Analysis to  
596 Predict Potential Spread and Seasonality for COVID-19. 2020. doi: [10.2139/ssrn.3550308](https://doi.org/10.2139/ssrn.3550308)
- 597 [34] Hersbach H, Dee D. ERA5 reanalysis is in production. ECMWF Newsletter 147 2016;  
598 ECMWF, Reading, UK.
- 599 [35] Gao J, Tian Z, Yang X. Breakthrough: Chloroquine phosphate has shown apparent efficacy  
600 in treatment of COVID-19 associated pneumonia in clinical studies. *Bioscience trends*.  
601 2020.
- 602 [36] Gautret P, Lagier JC, Parola P, Meddeb L, Mailhe M, Doudier B, Honore S.  
603 Hydroxychloroquine and azithromycin as a treatment of COVID-19: results of an open-label  
604 non-randomized clinical trial. *International journal of antimicrobial agents* 2020, 105949.
- 605 [37] Wang M, Cao R, Zhang L, Yang X, Liu J, Xu M, Shi Z, Hu Z, Zhong W, Xiao G.  
606 Remdesivir and chloroquine effectively inhibit the recently emerged novel coronavirus  
607 (2019-nCoV) in vitro. *Cell Res*. 2020b.
- 608 [38] Colson P, Rolain JM, Lagier JC, Brouqui P, and Raoult D. Chloroquine and  
609 Hydroxychloroquine as available weapons to fight COVID-19. *Int J Antimicrob Agents*.  
610 2020; 105932(10.1016).

- 611 [39] Battle K, et al. Global database of Plasmodium falciparum and P. vivax incidence records  
612 from 1985–2013, *Sci. Data.* 2015; 150012.
- 613 [40] Phelan AL, Katz R, and Gostin LO. The novel coronavirus originating in Wuhan, China:  
614 challenges for global health governance. *Jama.* 2020; 323(8): 709-710.
- 615 [41] Elith J, Leathwick JR, and Hastie TA. working guide to boosted regression trees. *J. Anim.*  
616 *Ecol.* 2008; 77 (4): 802–813. doi. [10.1111/j.1365-2656.2008.01390](https://doi.org/10.1111/j.1365-2656.2008.01390).
- 617 [42] Breiman L, Friedman J, Stone CJ, and Olshen RA. Classification and regression trees. *CRC*  
618 *press* 1984.
- 619 [43] Dedman S, Officer R, Clarke M, Reid DG, Brophy D. Gbm Auto: A Software Tool to  
620 Simplify Spatial Modelling and Marine Protected Area Planning. *PLoS ONE.* 2017; 12:  
621 e0188955.
- 622 [44] Pramanik M, Paudel U, Mondal B, Chakraborti S, Deb P. Predicting climate change impacts  
623 on the distribution of the threatened *Garcinia indica* in the Western Ghats, India. *Clim. Risk*  
624 *Manag* 2018; 19: 94–105.
- 625 [45] Hair JF, Anderson RE, Tatham RL, and Black WC. Multivariate Data Analysis, 3rd ed,  
626 *Macmillan Publishing Company.* 1995; New York
- 627 [46] Hastie T, Tibshirani R., and Friedman J. The Elements of Statistical Learning. *Springer*  
628 2011.
- 629 [47] Scikit-learn. Documentation: Ensemble Methods. Last update: 2015. URL <[http://scikit-](http://scikit-learn.org/stable/modules/ensemble.html#gradient-tree-boosting)  
630 [learn.org/stable/modules/ensemble.html#gradient-tree-boosting](http://scikit-learn.org/stable/modules/ensemble.html#gradient-tree-boosting)> (accessed 30/03/2020)
- 631 [48] Persson C, Bacher P, Shiga T, and Madsen H. Multi-site solar power forecasting using  
632 gradient boosted regression trees. *Solar Energy.* 2017; 150: 423-436.

- 633 [49] Ridgeway G. Generalized boosted models: a guide to the GBM package. 2007; Update 1  
634 (1), 2007.
- 635 [50] Fang LQ, Li XL, Liu K, Li YJ, Yao HW, Liang S, Yang Y, Feng ZJ, Gray GC, Cao WC.  
636 Mapping spread and risk of avian influenza A (H7N9) in China. *Scientific reports* 2013; 3:  
637 2722.
- 638 [51] Friedman JH. Greedy function approximation: A gradient boosting machine. *The Annals of*  
639 *Statistics* 2011; 29(5): 1189–1232.
- 640 [52] Thuiller W, Lavorel S, Araujo M. Niche properties and geographical extent as predictors of  
641 species sensitivity to climate change. *Glob. Ecol. Biogeogr.* 2005; 14: 347-357
- 642 [53] World Health Organization. (WHO). "Coronavirus disease, 2019". 2020b.
- 643 [54] Tosepu R. Gunawan J. Effendy DS Lestari H, Bahar H, and Asfian P. Correlation between  
644 weather and Covid-19 pandemic in Jakarta, Indonesia. *Science of The Total Environment*  
645 2020; 138436.
- 646 [55] Bu J, Dong-Dong P, Hui X, Qian Y, Yan H, Yu L, Gang H, and Jing C. Analysis of  
647 meteorological conditions and prediction of epidemic trend of 2019-nCoV infection in 2020  
648 medRxiv. 2020.
- 649 [56] Lowen AC, Mubareka S, Steel J, and Palese P. Influenza virus transmission is dependent on  
650 relative humidity and temperature. *PLoS Pathog.* 2007; 3(10), e151.
- 651 [57] Huang C, Wang Y, Li X, Ren L, Zhao J, Hu Y, Zhang L, Fan G, Xu J, Gu X, and Cheng Z.  
652 Clinical features of patients infected with 2019 novel coronavirus in Wuhan, China. *The*  
653 *Lancet* 2020; 395(10223), 497-506.

- 654 [58] Deyle ER, Maher MC, Hernandez, RD, Basu S, and Sugihara G. Global environmental  
655 drivers of influenza. *Proceedings of the National Academy of Sciences* 2016; 113(46),  
656 13081-13086.
- 657 [59] Ong SW, Tan YK, Chia PY, Lee TH, Ng OT, Wong MS. Air, surface environmental, and  
658 personal protective equipment contamination by severe acute respiratory syndrome  
659 coronavirus 2 (SARS-CoV-2) from a symptomatic patient. *JAMA*. 2020..
- 660 [60] Gaunt ER, Hardie A, Claas EC, Simmonds P, & Templeton KE. Epidemiology and clinical  
661 presentations of the four human coronaviruses 229E, HKU1, NL63, and OC43 detected over  
662 3 years using a novel multiplex real-time PCR method. *Journal of clinical microbiology*  
663 2010; 48(8): 2940-2947.

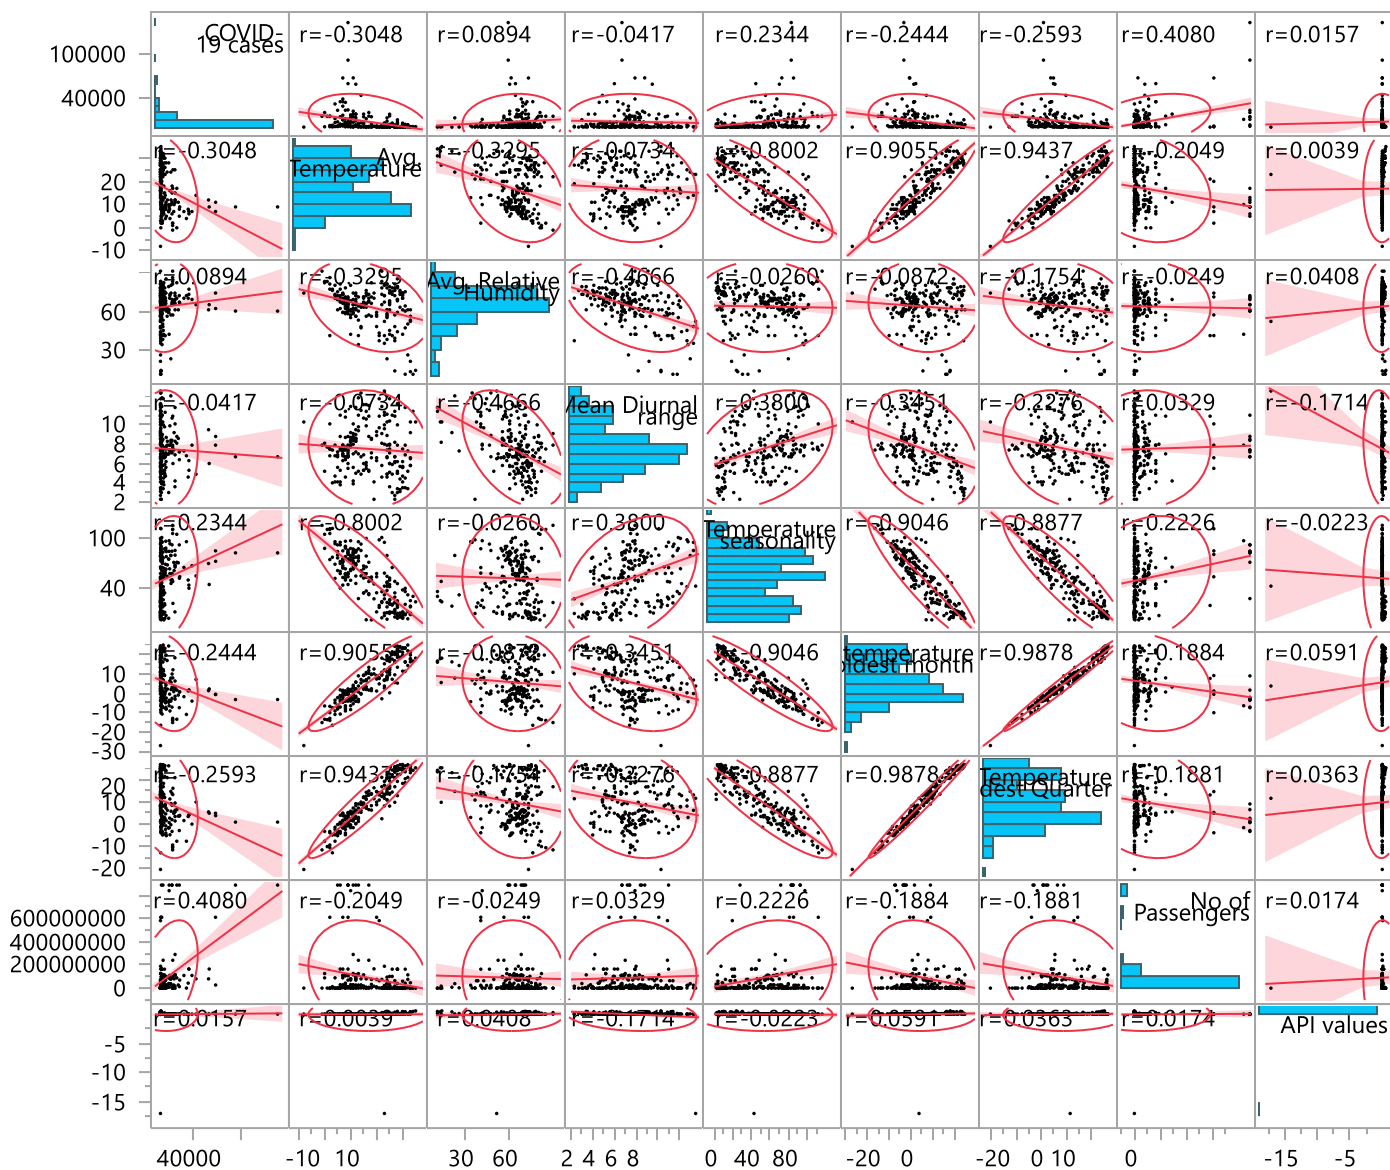

Fig 1: Scatterplot matrix showing the relationship between preliminary predictors and the number of COVID-19 cases. The corresponding correlation value (r) to identify insignificant predictors for the model are shown on the subplots.



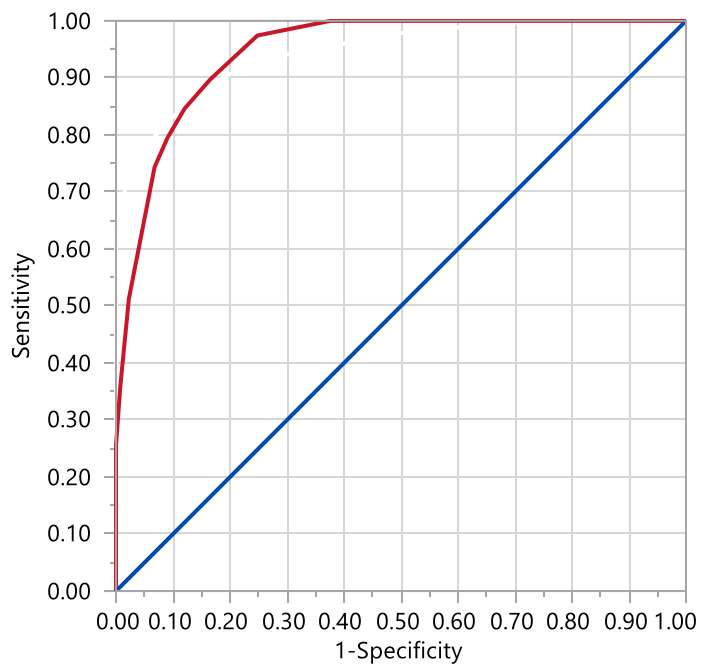

Fig. 2. The ROC curve for the BRT model. The AUC value 0.9462 indicates that the forecasting ability for the model is very good, showing a high level of accuracy.

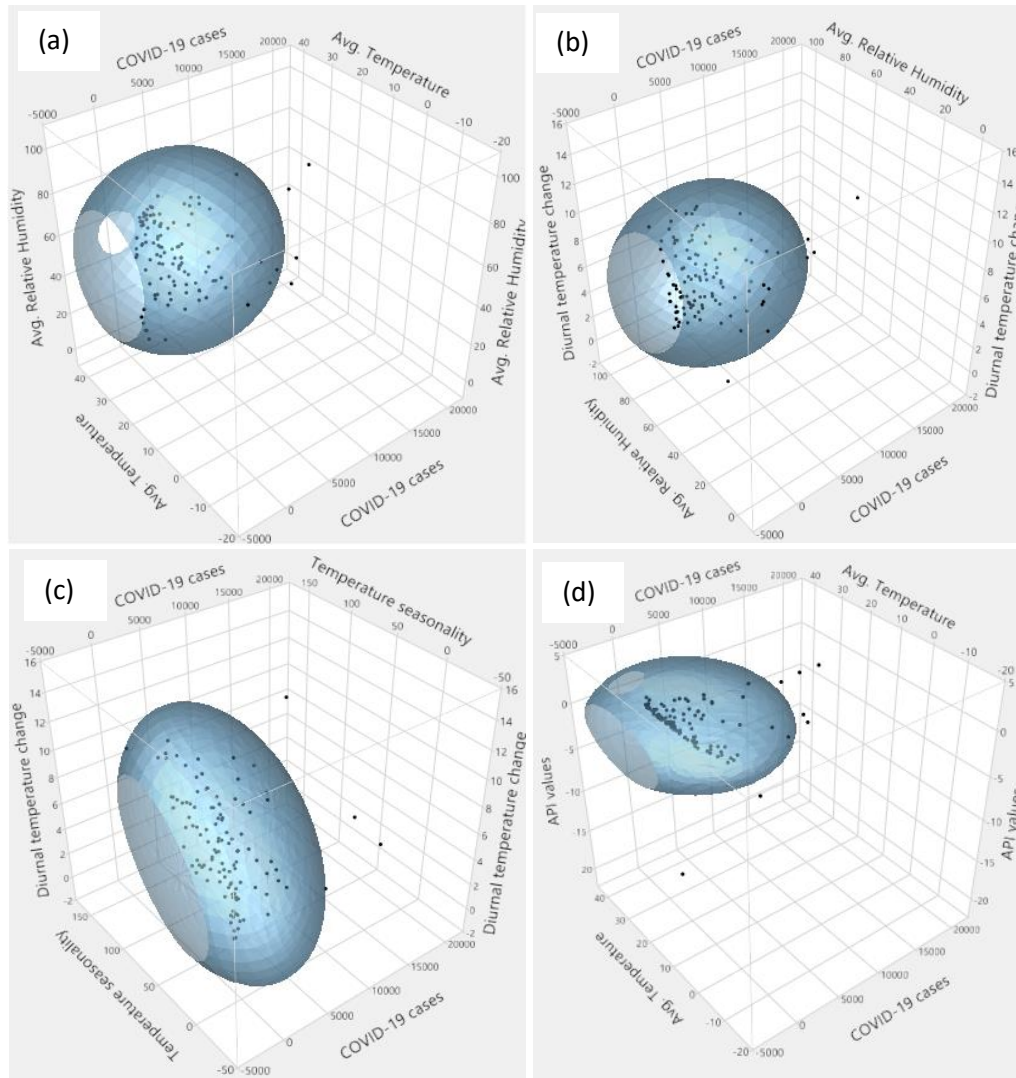

Fig 3: Relationship between selected climatic variables, number of international travelers and number of COVID-19 cases in the tropical region. Fig (a) COVID-19, relative humidity, and temperature; (b) COVID-19, diurnal range of temperature, and relative humidity; (c) COVID-19, temperature seasonality, and diurnal temperature change; (d) COVID-19, average temperature and API values.

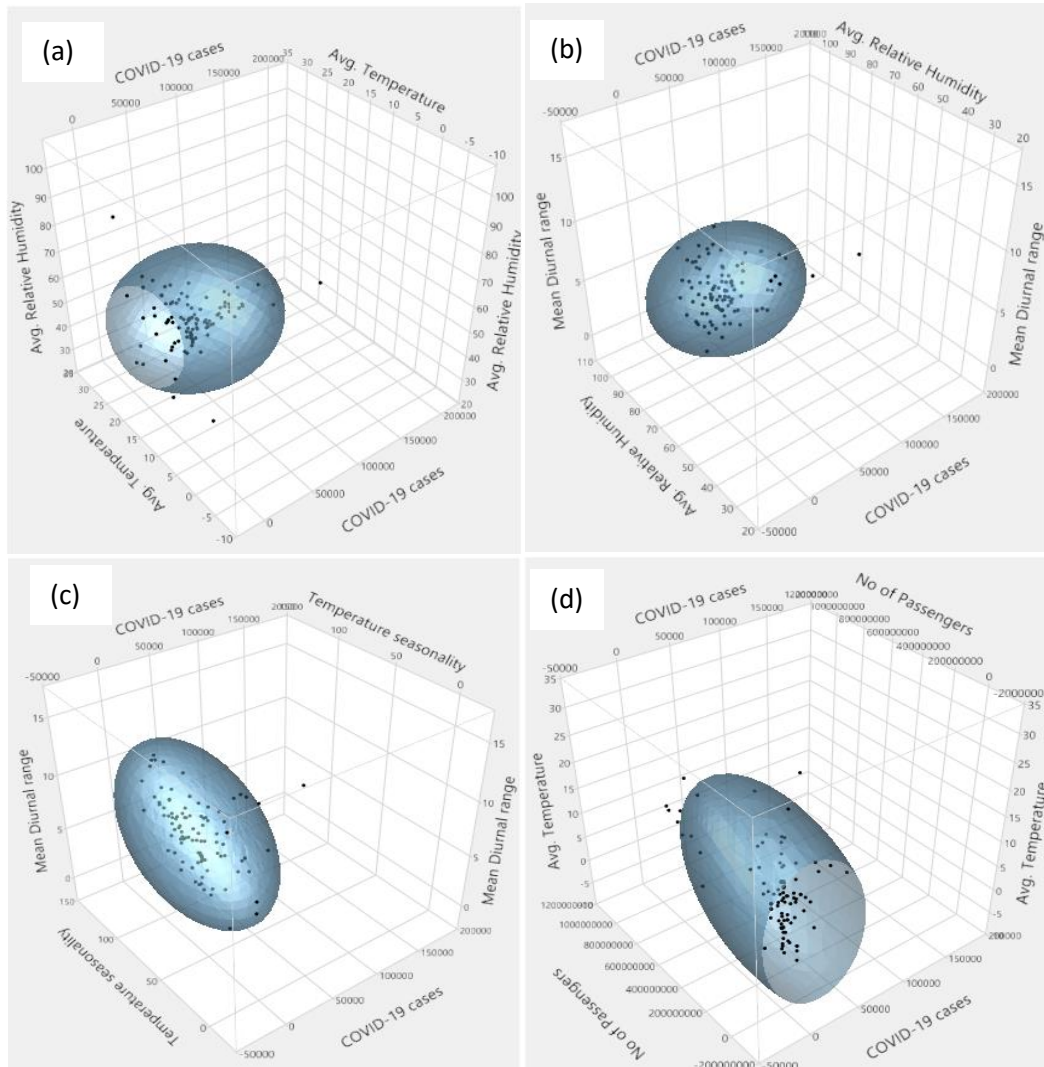

Fig 4: Relationship between selected climatic variables, the number of international travelers, and the number of COVID-19 cases in the temperate region, and a similar relationship has been observed for the sub-tropical region. Fig (a) CoVID-19, relative humidity, and temperature; (b) COVID-19, diurnal range of temperature, and relative humidity; (c) COVID-19, temperature seasonality, and diurnal temperature change; (d) COVID-19, average temperature and API values.

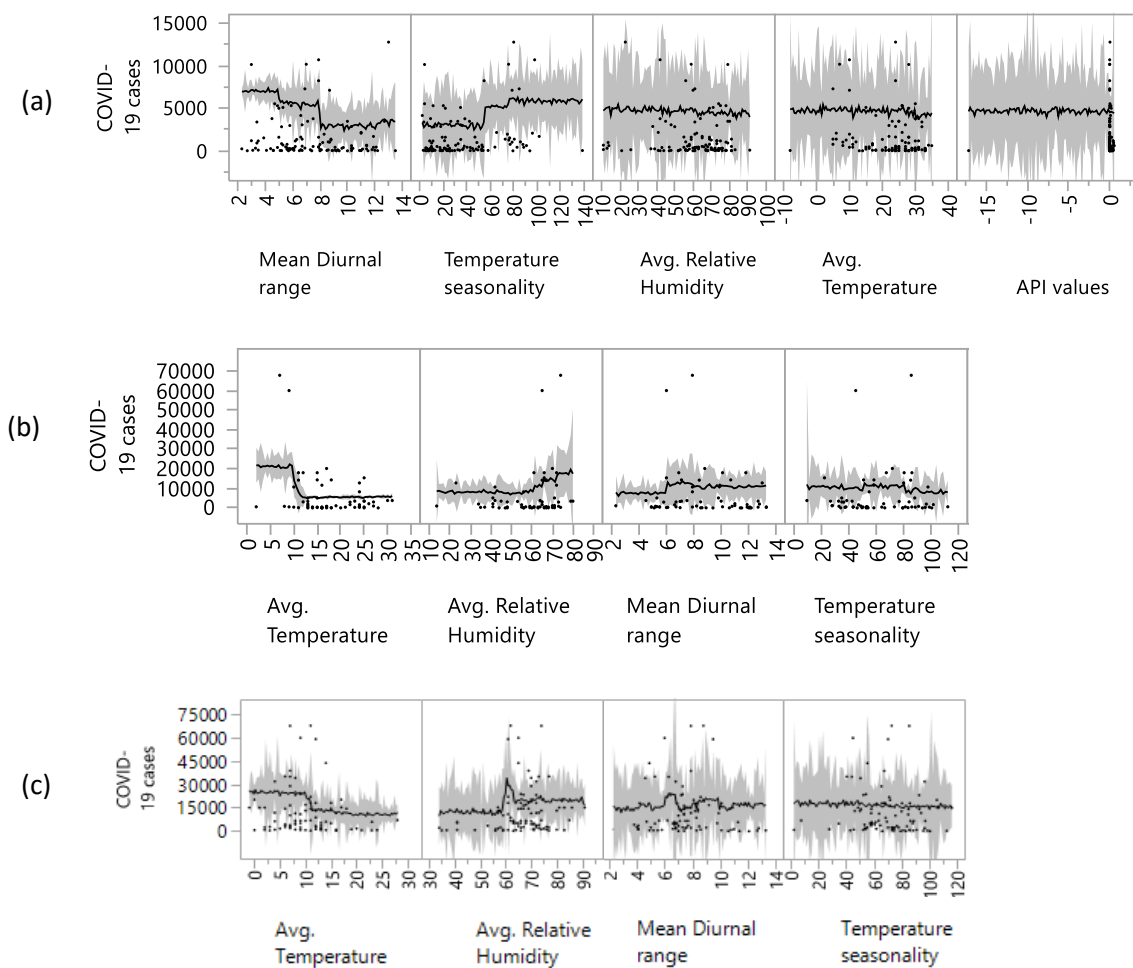

Fig. 5: Marginal dependence graphs for the five most influential predictors in the model for COVID-19 in tropical (a), sub-tropical (b), and temperate (c) regions. For explanation of predictors and their units, see Table 3. Y-axes are showing number COVID-19 cases, and X-axes represent predictors. The predictor, the number of international travelers, was omitted as this is a primary source of infection, but it has no role in community transmission. The API values considered only for the tropical region, where most of the countries of this region are malaria-prone. The shaded line shows a 95% confidence interval from the mean.

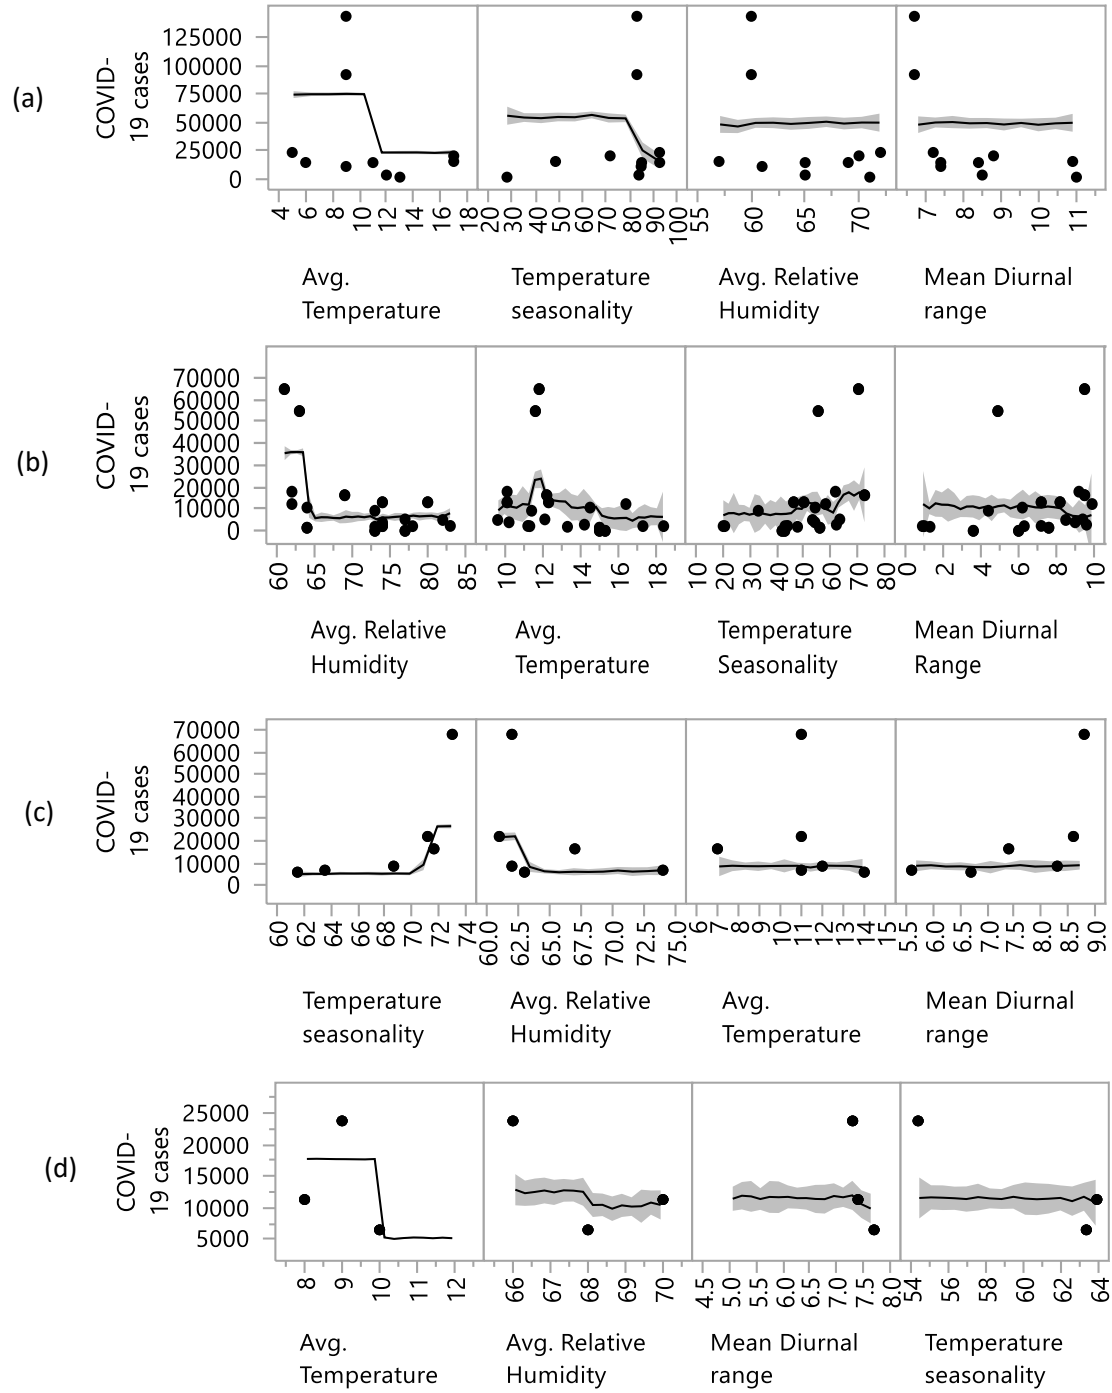

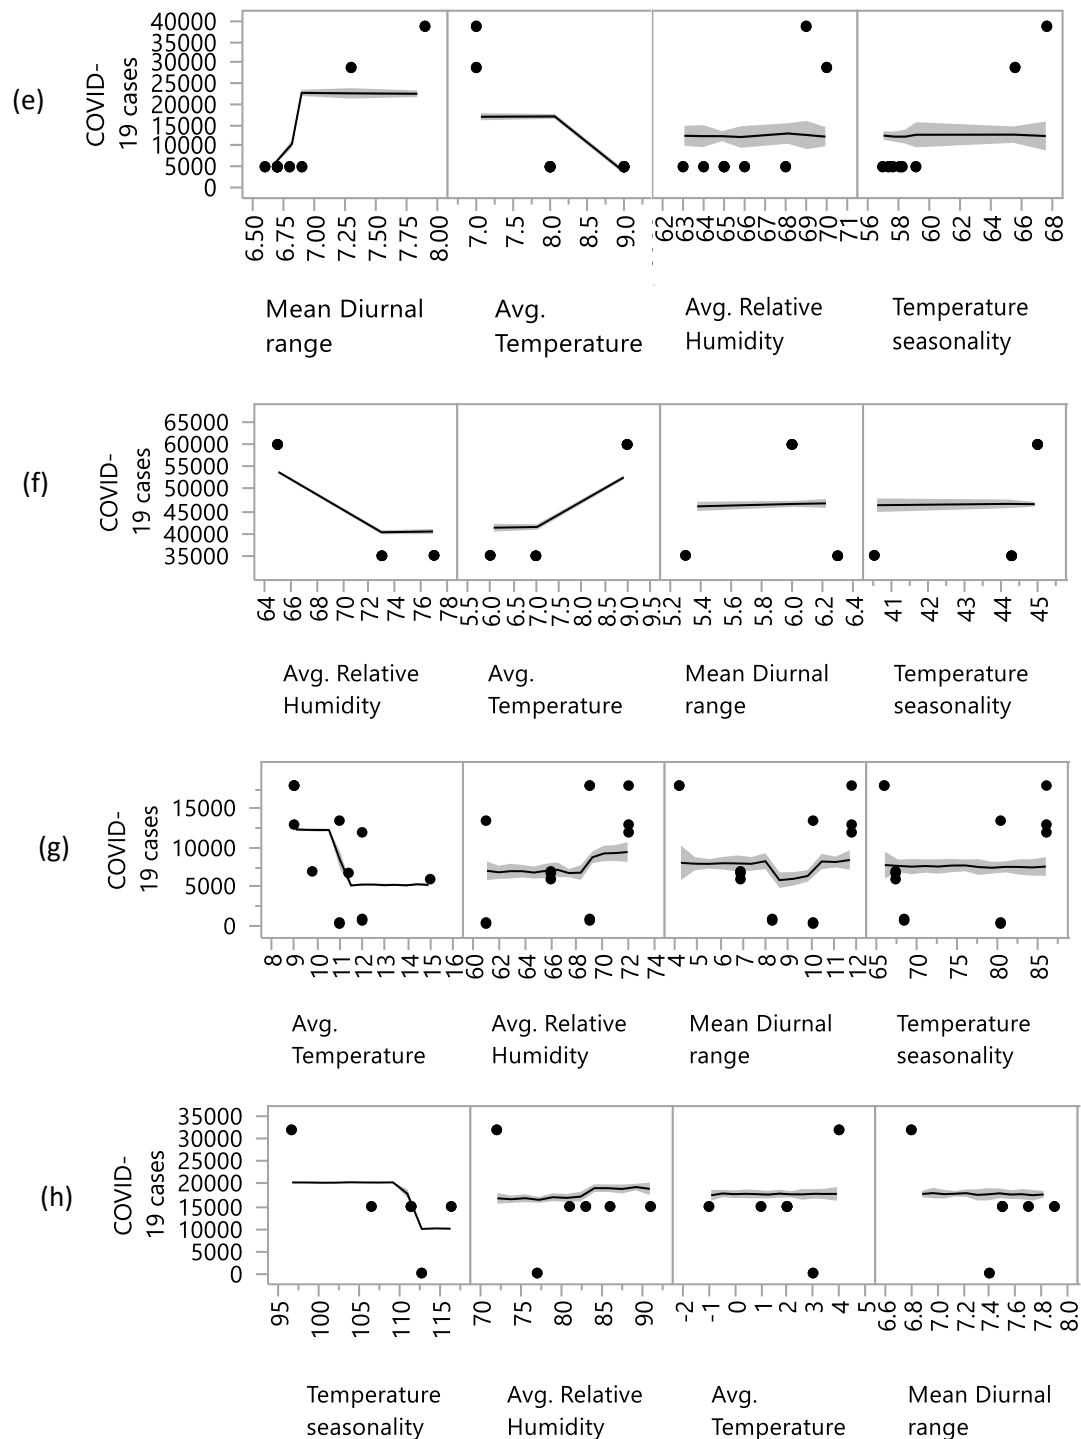

Fig. 6: Marginal dependence graphs for the four most influential predictors in the model for COVID-19 disease in the USA (a), Spain (b), Italy (c), France (d), Germany (e), UK (f), Turkey (g), Russia (h). For explanation of predictors and their units, see Table 3. Y-axes are showing the number of COVID-19 cases, and X-axes represent predictors. The predictor, the number of international travelers, was omitted as it is a primary source of infection, but it has no role in community transmission. The API was omitted for fewer malaria cases in the temperate region. The shaded line shows a 95% confidence interval from the mean.

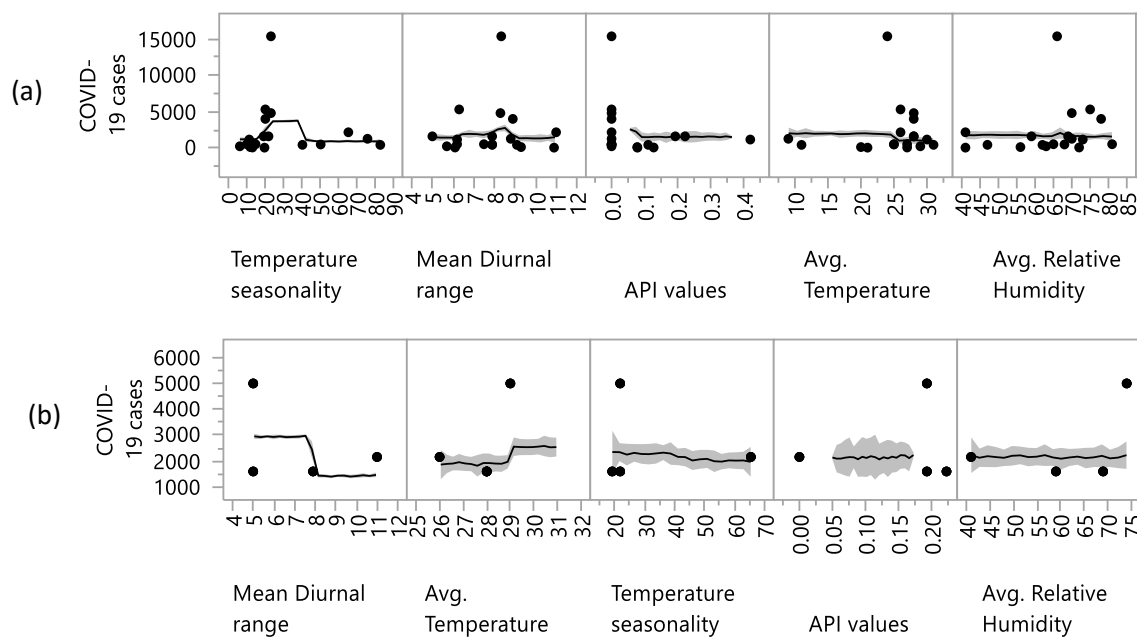

Fig. 7: Marginal dependence graphs for the five most influential predictors in the model for COVID-19 in India (a), Brazil (b). For explanation of predictors and their units, see Table 3. Y-axes are showing COVID-19 cases, and X-axes represent predictors. The predictor, the number of international travelers, was omitted, as it is a primary source of infection, but has no role in community transmission. The value of API was considered in the analysis as these countries are malaria-prone. Shaded line shows a 95% confidence interval from the mean.

Table 1: List of preliminary and final selected variable for the BRT model

| Sl. no. | Predictors for the COVID-19                  | Preliminary selected variables | Variable for the final model |
|---------|----------------------------------------------|--------------------------------|------------------------------|
| 1.      | Average temperature (°C)                     | *                              | √                            |
| 2.      | Monthly relative humidity (%)                | *                              | √                            |
| 3.      | Diurnal temperature change (°C)              | *                              | √                            |
| 4.      | Temperature Seasonality (%)                  | *                              | √                            |
| 5.      | Mean temperature of the coldest month (°C)   | *                              | -                            |
| 6.      | Mean temperature of the coldest Quarter (°C) | *                              | -                            |
| 7.      | No of Passengers                             | *                              | √                            |
| 8.      | API values (per 1000 pops)                   | *                              | √                            |

Table 2: Meteorological quantiles (10th, 90th percentiles) of climatic, bioclimatic, and API values for COVID-19 cases in different climate zones and largest spillover countries in the World

| Countries                                               | Medians (10 <sup>th</sup> , 90 <sup>th</sup> percentiles) |                             |                            |                         |                            |
|---------------------------------------------------------|-----------------------------------------------------------|-----------------------------|----------------------------|-------------------------|----------------------------|
|                                                         | Avg. temperature (°C)                                     | Temperature seasonality (%) | Avg. relative humidity (%) | Mean diurnal range (°C) | API values (per 1000 pops) |
| The countries with the highest number of COVID-19 cases |                                                           |                             |                            |                         |                            |
| USA                                                     | 10 (6,17)                                                 | 84 (47,93)                  | 65 (60,71)                 | 8 (7,11)                | -                          |
| Spain                                                   | 12 (10,15)                                                | 57 (48,66)                  | 70 (63,77)                 | 9 (6,10)                | -                          |
| Italy                                                   | 11 (9,13)                                                 | 70 (63,72)                  | 63 (62,71)                 | 8 (6,9)                 | -                          |
| Germany                                                 | 8 (7,9)                                                   | 58 (57,66)                  | 66 (64,69)                 | 7 (7,7)                 | -                          |
| UK                                                      | 7 (6,9)                                                   | 44 (41,45)                  | 73 (67,76)                 | 6 (5,6)                 | -                          |
| Russia                                                  | 2 (0,4)                                                   | 111 (102,115)               | 82 (75,89)                 | 8 (7,8)                 | -                          |
| Turkey                                                  | 11 (9,14)                                                 | 68 (67,84)                  | 69 (63,71)                 | 8 (5,11)                | -                          |
| France                                                  | 10 (8,12)                                                 | 59 (54,64)                  | 68 (66,70)                 | 7 (5,8)                 | -                          |
| Brazil                                                  | 27 (25,28)                                                | 22 (20,23)                  | 73 (67,77)                 | 8 (7,9)                 | 0.12 (0.06,0.18)           |
| India                                                   | 28 (27,30)                                                | 22 (20,55)                  | 59 (43,72)                 | 8 (5,10)                | 0.005 (0.001, 0.009)       |
| Climatic zones                                          |                                                           |                             |                            |                         |                            |
| Tropical                                                | 25 (10,31)                                                | 27 (8,80)                   | 65 (41,78)                 | 7 (4,11)                | -                          |
| Sub-tropical                                            | 17 (10,25)                                                | 58 (33,96)                  | 64 (41,72)                 | 8 (5,12)                | -                          |
| Temperate                                               | 9 (4,17)                                                  | 70 (46,97)                  | 67 (57,77)                 | 7 (5,11)                | -                          |



Table 3: Relative importance of predictors (climatic, bioclimatic, travel passenger, and API variables) in percent ( $\pm$ SD) and goodness of fit of the model.

| Countries                                               | Predictors importance (%) to the COVID-19 cases |                             |                            |                         |                  |                            |                |
|---------------------------------------------------------|-------------------------------------------------|-----------------------------|----------------------------|-------------------------|------------------|----------------------------|----------------|
|                                                         | Avg. Temperature (°C)                           | Temperature seasonality (%) | Avg. Relative Humidity (%) | Mean Diurnal range (°C) | No of Passengers | API values (per 1000 pops) | R <sup>2</sup> |
| The countries with the highest number of COVID-19 cases |                                                 |                             |                            |                         |                  |                            |                |
| USA                                                     | 75.1 $\pm$ 3.1                                  | 21.5 $\pm$ 0.6              | 2.40 $\pm$ 0.3             | 0.80 $\pm$ 0.01         | 0.20 $\pm$ 0.01  | -                          | 0.834          |
| Spain                                                   | 20.70 $\pm$ 1.2                                 | 6.80 $\pm$ 0.8              | 71.0 $\pm$ 2.4             | 1.30 $\pm$ 0.01         | 0.02 $\pm$ 0.01  | -                          | 0.923          |
| Italy                                                   | 4.00 $\pm$ 0.3                                  | 64.3 $\pm$ 1.8              | 32.2 $\pm$ 1.1             | 0.30 $\pm$ 0.01         | 0.01 $\pm$ 0.01  | -                          | 0.893          |
| Germany                                                 | 34.3 $\pm$ 1.7                                  | 1.00 $\pm$ 0.01             | 4.40 $\pm$ 0.3             | 60.2 $\pm$ 2.4          | 0.10 $\pm$ 0.01  | -                          | 0.819          |
| UK                                                      | 39.4 $\pm$ 2.1                                  | 3.00 $\pm$ 0.02             | 56.6 $\pm$ 0.5             | 3.00 $\pm$ 0.2          | 0.30 $\pm$ 0.02  | -                          | 0.910          |
| Russia                                                  | 2.70 $\pm$ 0.1                                  | 92.3 $\pm$ 3.06             | 4.30 $\pm$ 0.1             | 0.40 $\pm$ 0.01         | 0.30 $\pm$ 0.02  | -                          | 0.798          |
| Turkey                                                  | 82.8 $\pm$ 3.5                                  | 3.70 $\pm$ 0.6              | 7.40 $\pm$ 0.1             | 5.10 $\pm$ 0.7          | 1.00 $\pm$ 0.04  | -                          | 0.823          |
| France                                                  | 90.7 $\pm$ 3.2                                  | 0.10 $\pm$ 0.01             | 6.00 $\pm$ 0.3             | 3.10 $\pm$ 0.4          | 0.10 $\pm$ 0.01  | -                          | 0.865          |
| Brazil                                                  | 11.6 $\pm$ 0.3                                  | 41.4 $\pm$ 0.9              | 10.3 $\pm$ 0.3             | 23.1 $\pm$ 0.3          | 1.40 $\pm$ 0.05  | 12.2 $\pm$ 0.2             | 0.869          |
| India                                                   | 13.0 $\pm$ 0.4                                  | 1.40 $\pm$ 0.01             | 2.00 $\pm$ 0.01            | 80.7 $\pm$ 0.9          | 0.90 $\pm$ 0.3   | 2.00 $\pm$ 0.1             | 0.908          |
| Climatic zones                                          |                                                 |                             |                            |                         |                  |                            |                |
| Tropical                                                | 4.00 $\pm$ 0.3                                  | 33.3 $\pm$ 1.1              | 6.70 $\pm$ 0.3             | 54.7 $\pm$ 2.1          | 1.70 $\pm$ 0.1   | 10.0 $\pm$ 0.2             | 0.875          |
| Sub-tropical                                            | 66.5 $\pm$ 2.6                                  | 5.50 $\pm$ 0.2              | 22.3 $\pm$ 0.7             | 5.50 $\pm$ 0.2          | 0.80 $\pm$ 0.02  | -                          | 0.912          |
| Temperate                                               | 47.7 $\pm$ 1.6                                  | 12.0 $\pm$ 0.3              | 30.5 $\pm$ 0.9             | 9.20 $\pm$ 0.1          | 0.90 $\pm$ 0.01  | -                          | 0.863          |

## Supplementary tables

**Table S1:** The Pearson correlation test results for COVID-19 cases and selected variables (5% significance level). The cut-off threshold is 0.85.

| Variables                           | COVID-19 cases | Avg. temperature | Avg. relative humidity | Mean diurnal range | Temperature seasonality | Mean temperature of the coldest month | Mean temperature of the coldest quarter | Number of passengers | API values |
|-------------------------------------|----------------|------------------|------------------------|--------------------|-------------------------|---------------------------------------|-----------------------------------------|----------------------|------------|
| COVID-19 cases                      | 1.0000         | -0.3048          | 0.0894                 | -0.0417            | 0.2344                  | -0.2444                               | -0.2593                                 | 0.4080               | 0.0157     |
| Avg. temperature                    | -0.3048        | 1.0000           | -0.3295                | -0.0734            | -0.8002                 | 0.9055                                | 0.9437                                  | -0.2049              | 0.0039     |
| Avg. relative humidity              | 0.0894         | -0.3295          | 1.0000                 | -0.4666            | -0.0260                 | -0.0872                               | -0.1754                                 | -0.0249              | 0.0408     |
| Mean diurnal range                  | -0.0417        | -0.0734          | -0.4666                | 1.0000             | 0.3800                  | -0.3451                               | -0.2276                                 | 0.0329               | -0.1714    |
| Temperature seasonality             | 0.2344         | -0.8002          | -0.0260                | 0.3800             | 1.0000                  | -0.9046                               | -0.8877                                 | 0.2226               | -0.0223    |
| Mean temperature of coldest month   | -0.2444        | 0.9055           | -0.0872                | -0.3451            | -0.9046                 | 1.0000                                | 0.9878                                  | -0.1884              | 0.0591     |
| Mean temperature of coldest quarter | -0.2593        | 0.9437           | -0.1754                | -0.2276            | -0.8877                 | 0.9878                                | 1.0000                                  | -0.1881              | 0.0363     |
| Number of passengers                | 0.4080         | -0.2049          | -0.0249                | 0.0329             | 0.2226                  | -0.1884                               | -0.1881                                 | 1.0000               | 0.0174     |
| API values                          | 0.0157         | 0.0039           | 0.0408                 | -0.1714            | -0.0223                 | 0.0591                                | 0.0363                                  | 0.0174               | 1.0000     |

Table S2: Showing Variance Inflation factor (VIF) value to check significant variable from the primarily selected variables

| <b>Term</b>                             | <b>Estimate</b> | <b>Std Error</b> | <b>t Ratio</b> | <b>Prob&gt; t </b> | <b>VIF</b> |
|-----------------------------------------|-----------------|------------------|----------------|--------------------|------------|
| Intercept                               | 3597.3204       | 3698.796         | 0.97           | 0.3330             | .          |
| Avg. temperature                        | -25.22334       | 113.3874         | -0.22          | 0.8244             | 6.1392849  |
| Avg. relative humidity                  | -11.16929       | 23.89495         | -0.47          | 0.6411             | 1.9539564  |
| Mean diurnal range                      | -199.7291       | 212.19           | -0.94          | 0.3487             | 3.9149944  |
| Temperature seasonality                 | 21.726566       | 24.70188         | 0.88           | 0.3811             | 6.1399372  |
| Mean temperature of the coldest month   | 148.30745       | 300.3049         | 0.49           | 0.6224             | 111.50138  |
| Mean temperature of the coldest quarter | -116.9129       | 336.9731         | -0.35          | 0.7293             | 126.26264  |
| Number of passengers                    | 8.3254e-6       | 2.908e-6         | 2.86           | 0.0051*            | 1.04387    |
| API values                              | -31.63317       | 184.9953         | -0.17          | 0.8646             | 1.0610794  |

Table 3. Model settings for the bag fraction (0.50 and 0.75) comparison for the relative importance of the selected predictors settings in the BRT models

| Countries & climatic regions | Predictors importance (%) to the COVID-19 cases |                       |                             |                            |                         |                      |                                  |
|------------------------------|-------------------------------------------------|-----------------------|-----------------------------|----------------------------|-------------------------|----------------------|----------------------------------|
|                              | Bag fraction                                    | Avg. temperature (°C) | Temperature seasonality (%) | Avg. relative humidity (%) | Mean diurnal range (°C) | Number of Passengers | API values (per 1000 population) |
| USA                          | 0.75                                            | 75.1                  | 21.5                        | 2.4                        | 0.8                     | 0.2                  | -                                |
|                              | 0.50                                            | 74.4                  | 20.9                        | 2.3                        | 0.7                     | 0.2                  | -                                |
| Spain                        | 0.75                                            | 0.70                  | 0.21                        | 99.0                       | 0.07                    | 0.02                 | -                                |
|                              | 0.50                                            | 0.60                  | 0.22                        | 98.2                       | 0.06                    | 0.01                 | -                                |
| Italy                        | 0.75                                            | 4.00                  | 64.3                        | 32.2                       | 0.3                     | 0.01                 | -                                |
|                              | 0.50                                            | 3.80                  | 63.1                        | 31.1                       | 0.2                     | 0.01                 | -                                |
| Germany                      | 0.75                                            | 34.3                  | 1.0                         | 4.4                        | 60.2                    | 0.1                  | -                                |
|                              | 0.50                                            | 33.9                  | 0.8                         | 4.3                        | 59.6                    | 0.07                 | -                                |
| UK                           | 0.75                                            | 39.4                  | 3.0                         | 56.6                       | 3.0                     | 0.3                  | -                                |
|                              | 0.50                                            | 38.7                  | 3.2                         | 56.2                       | 2.9                     | 0.23                 | -                                |
| Russia                       | 0.75                                            | 2.70                  | 92.30                       | 4.3                        | 0.4                     | 0.3                  | -                                |
|                              | 0.50                                            | 2.50                  | 90.43                       | 4.1                        | 0.3                     | 0.33                 | -                                |
| Turkey                       | 0.75                                            | 82.8                  | 3.7                         | 7.4                        | 5.1                     | 1.0                  | -                                |
|                              | 0.50                                            | 82.6                  | 3.8                         | 7.2                        | 4.9                     | 0.8                  | -                                |
| France                       | 0.75                                            | 90.7                  | 0.1                         | 6.0                        | 3.1                     | 0.1                  | -                                |
|                              | 0.50                                            | 90.5                  | 0.1                         | 6.3                        | 2.9                     | 0.8                  | -                                |
| Brazil                       | 0.75                                            | 11.6                  | 41.4                        | 10.3                       | 23.1                    | 1.4                  | 12.2                             |
|                              | 0.50                                            | 11.5                  | 41.3                        | 9.8                        | 23.0                    | 1.3                  | 12.1                             |
| India                        | 0.75                                            | 13.0                  | 1.4                         | 2.0                        | 80.7                    | 0.9                  | 2.0                              |
|                              | 0.50                                            | 12.6                  | 1.3                         | 1.7                        | 79.4                    | 0.6                  | 1.8                              |
| Tropical                     | 0.75                                            | 4.00                  | 33.3                        | 6.7                        | 54.7                    | 1.7                  | 10.0                             |
|                              | 0.50                                            | 4.10                  | 33.4                        | 5.8                        | 53.4                    | 1.3                  | 10.2                             |
| Sub-tropical                 | 0.75                                            | 66.5                  | 5.5                         | 22.3                       | 5.5                     | 0.8                  | -                                |
|                              | 0.50                                            | 66.1                  | 5.6                         | 21.3                       | 5.3                     | 0.6                  | -                                |
| Temperate                    | 0.75                                            | 47.7                  | 12.0                        | 30.5                       | 9.2                     | 0.9                  | -                                |
|                              | 0.50                                            | 47.1                  | 12.3                        | 31.3                       | 9.3                     | 0.6                  | -                                |
